# Supplementary material for: Chemical Characterization, Antioxidant, Cytotoxic and Microbiological Activities of the Essential Oil of Leaf of Tithonia Diversifolia (Hemsl) A. Gray (Asteraceae)
Source: MDPI journal article supplement (doi:10.3390/ph12010034), 2019-03-04
Supplement: s1 [file s1]

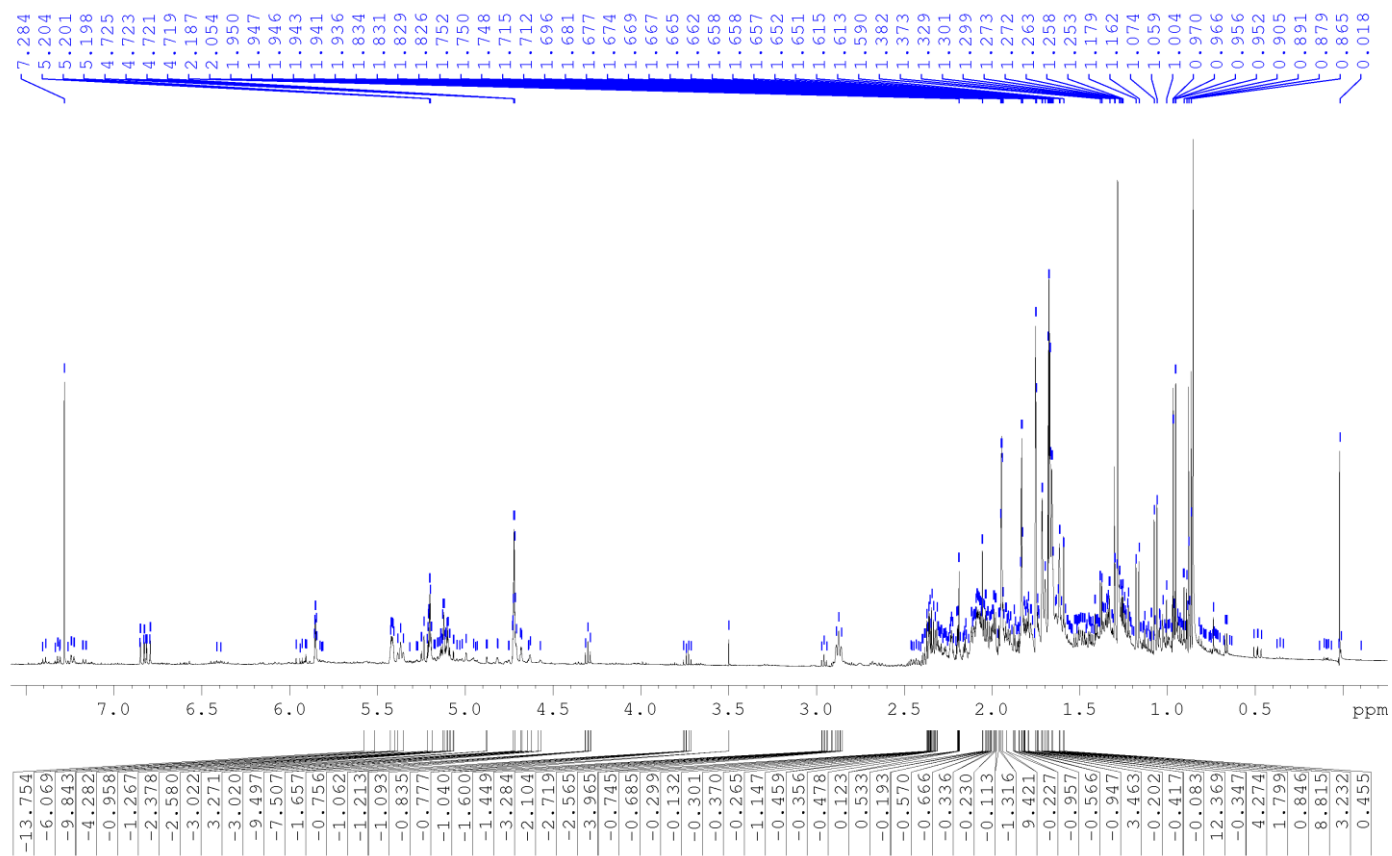

**Figure S1.** The  $^1\text{H}$  NMR spectrum ( $\text{CDCl}_3$ , 400 MHz) of the essential oil of the leaves of *T. diversifolia*.

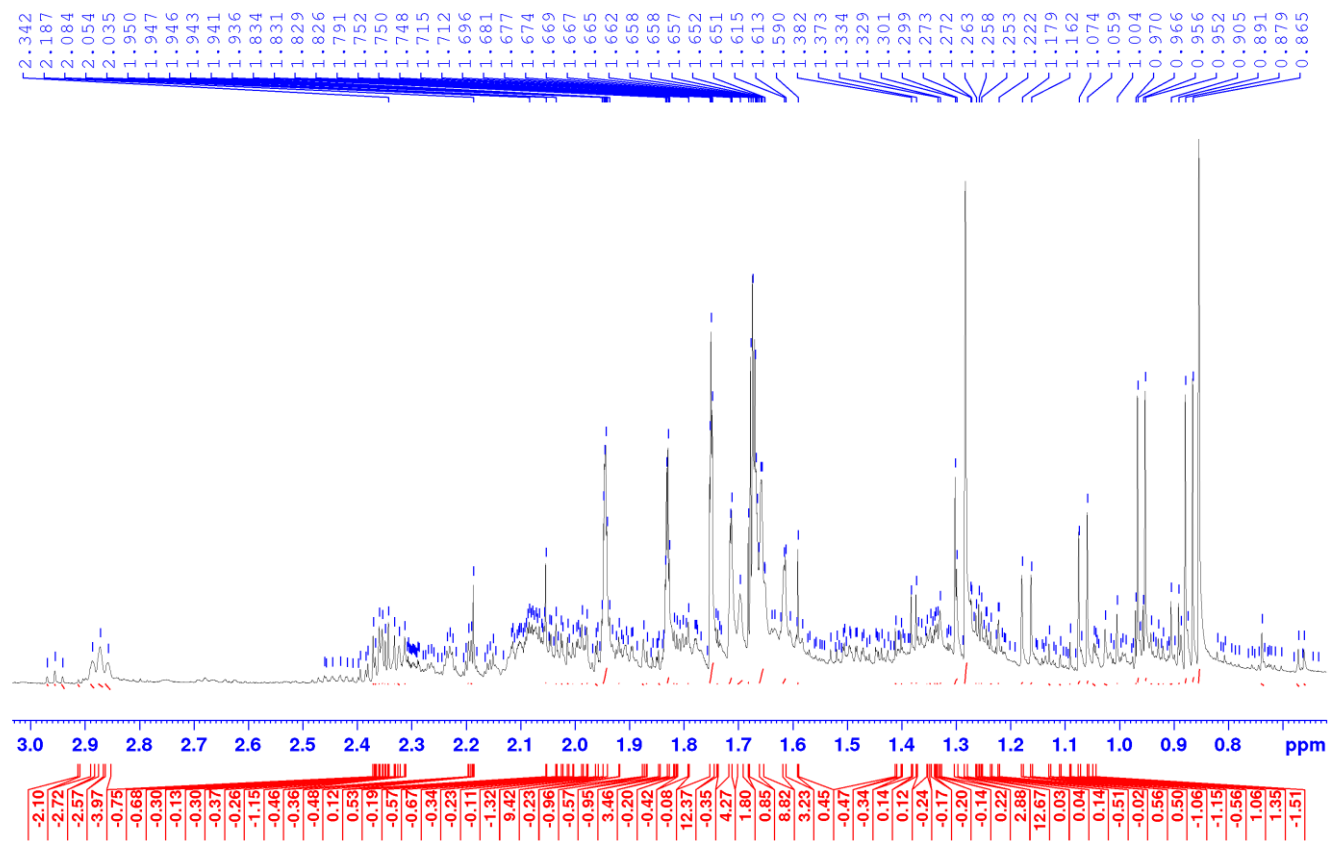

**Figure S2.** Amplification (0.5–3.0) of the  $^1\text{H}$  NMR spectrum ( $\text{CDCl}_3$ , 400 MHz) of the essential oil of the leaves of *T. diversifolia*.

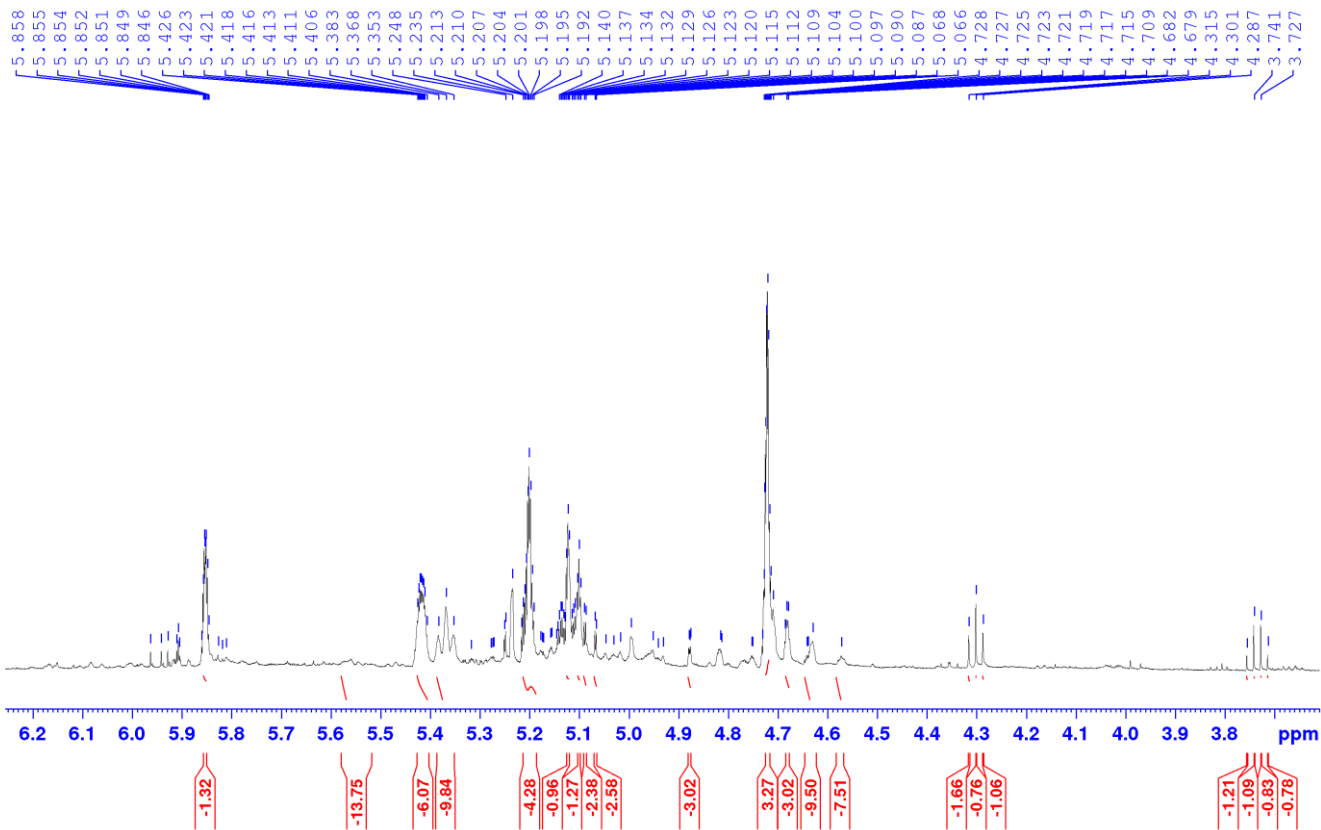

**Figure S3.** Amplification (6.2–3.8) of the  $^1\text{H}$  NMR spectrum ( $\text{CDCl}_3$ , 400 MHz) of the essential oil of the leaves of *T. diversifolia*.

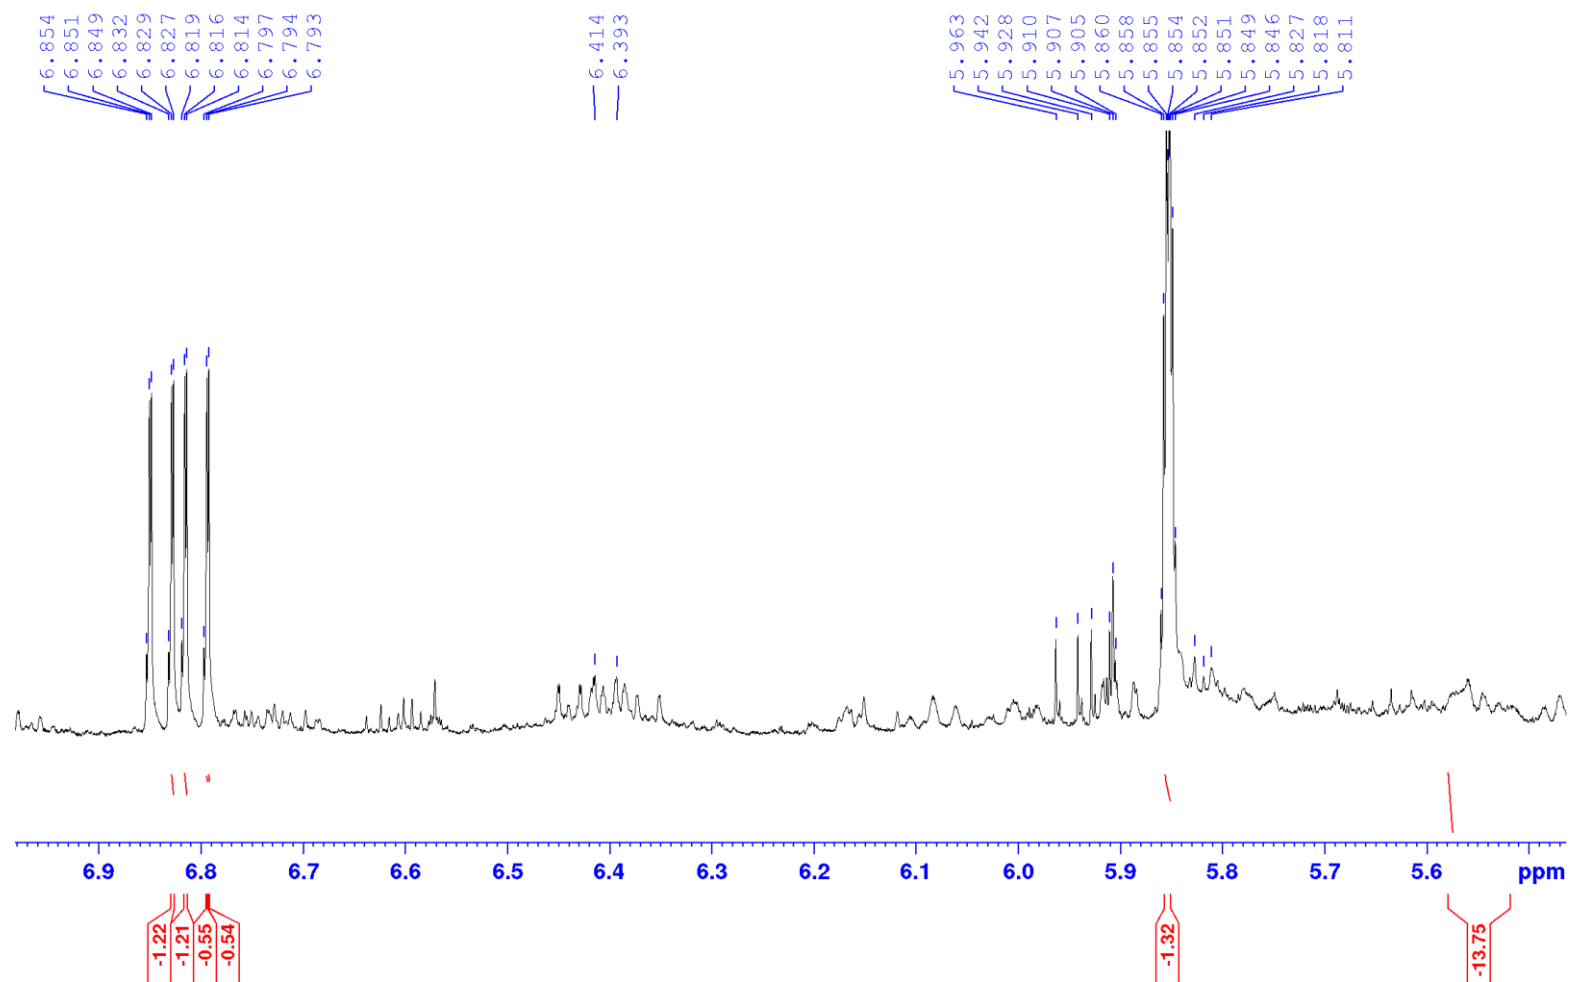

**Figure S4.** Amplification (6.9–5.6) of the  $^1\text{H}$  NMR spectrum ( $\text{CDCl}_3$ , 400 MHz) of the essential oil of the leaves of *T. diversifolia*.

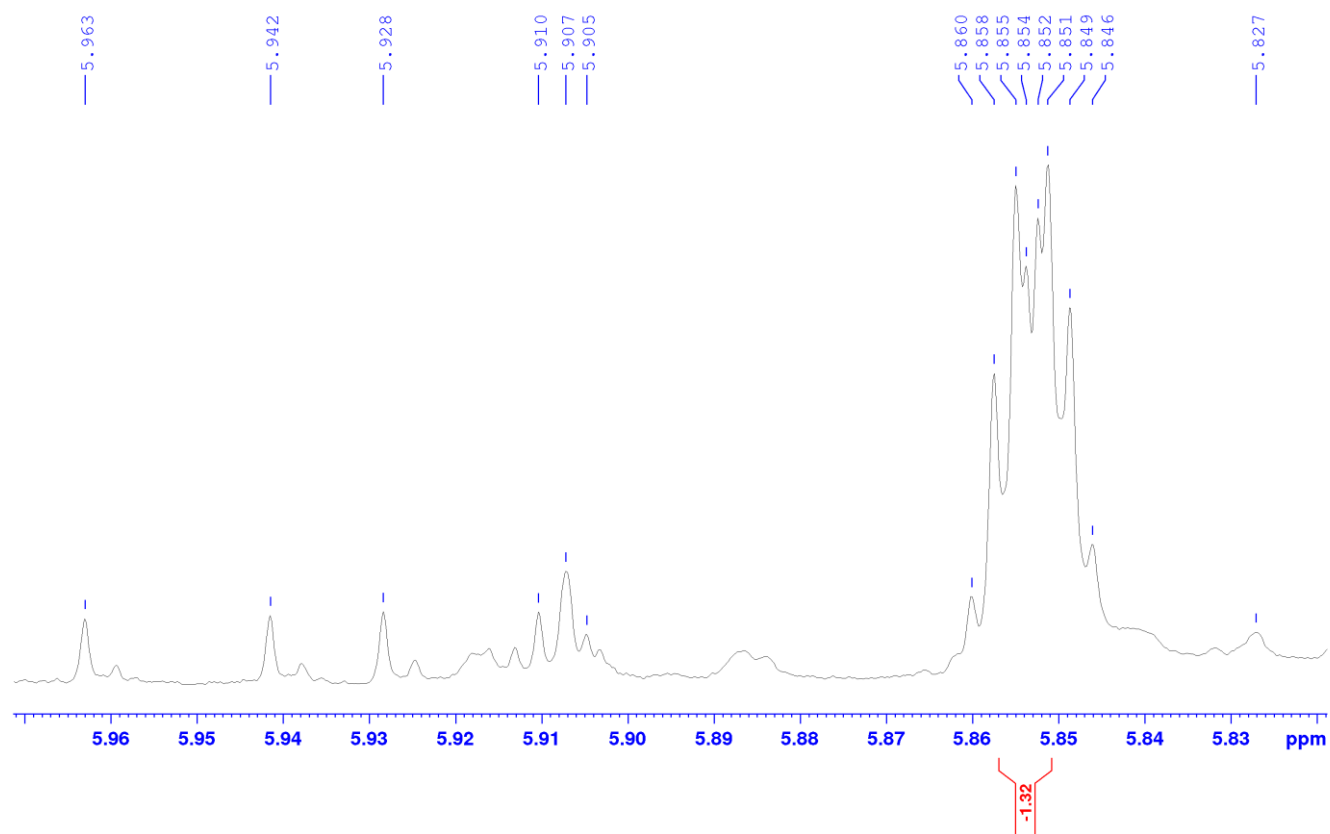

**Figure S5.** Amplification (5.96–5.83) of the  $^1\text{H}$  NMR spectrum ( $\text{CDCl}_3$ , 400 MHz) of the essential oil of the leaves of *T. diversifolia*.

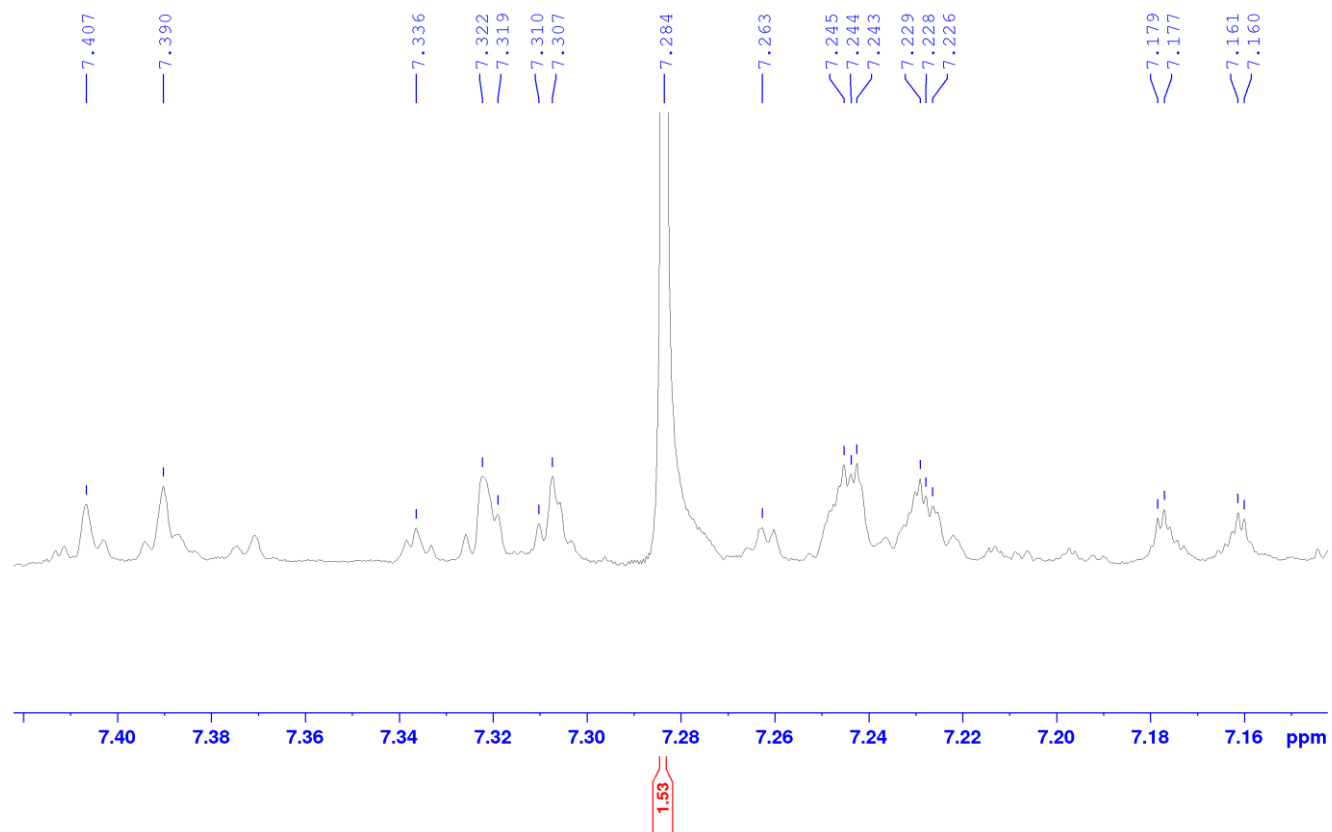

**Figure S6.** Amplification (7.40–7.16) of the  $^1\text{H}$  NMR spectrum ( $\text{CDCl}_3$ , 400 MHz) of the essential oil of the leaves of *T. diversifolia*.

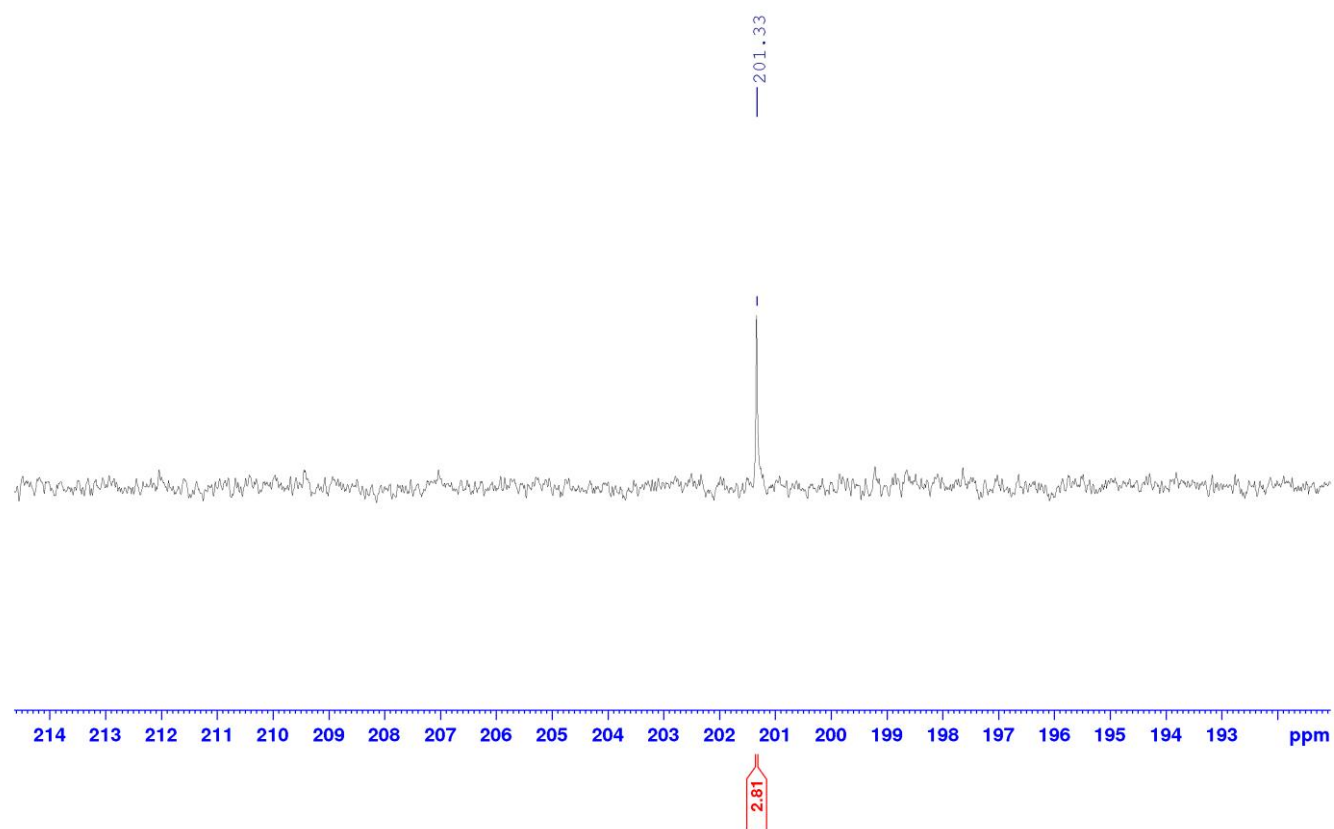

**Figure S7.** Amplification (214–193) of the  $^{13}\text{C}$  NMR spectrum ( $\text{CDCl}_3$ , 400 MHz) of the essential oil of the leaves of *T. diversifolia*.

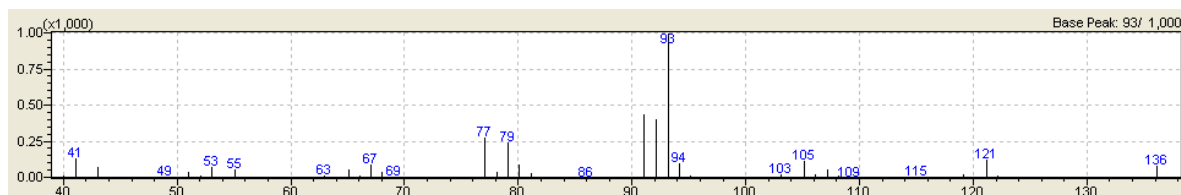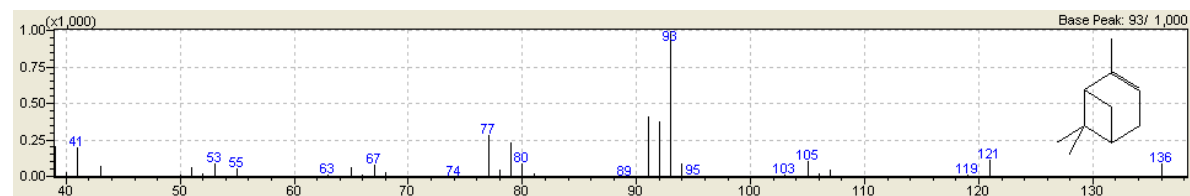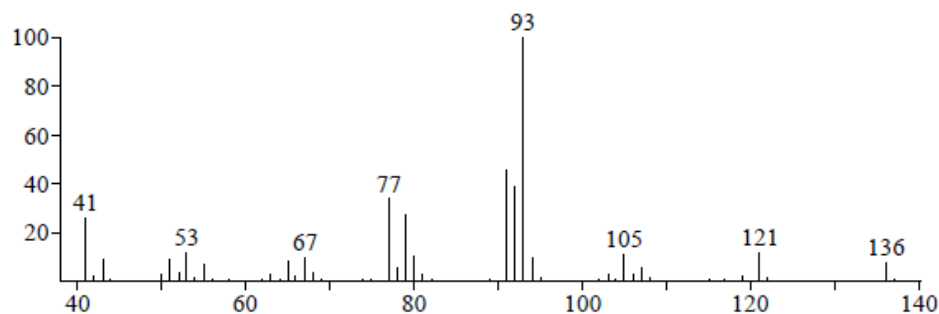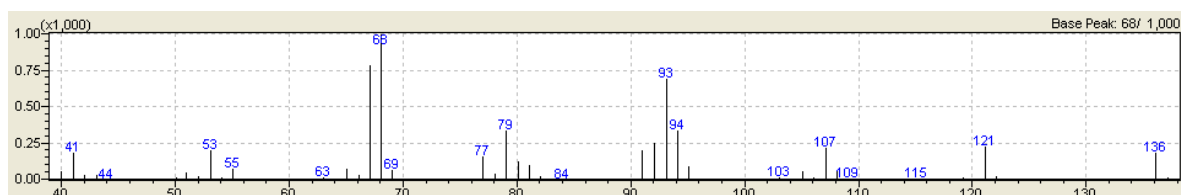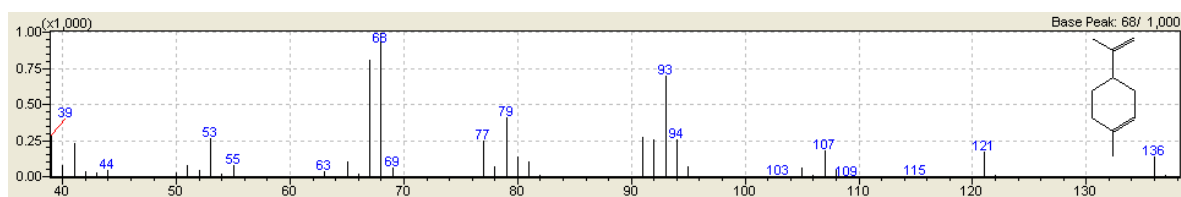



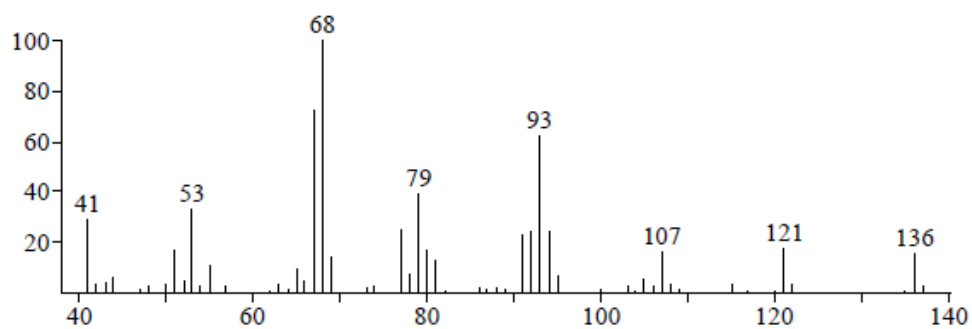

Literature mass spectrum (Adams, 2017).

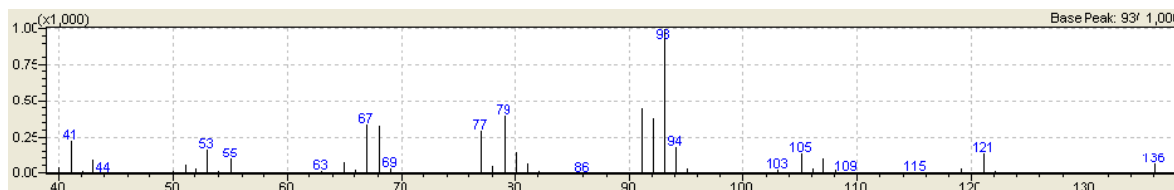

Compound mass spectrum  $Z$ - $\beta$ -ocimene.

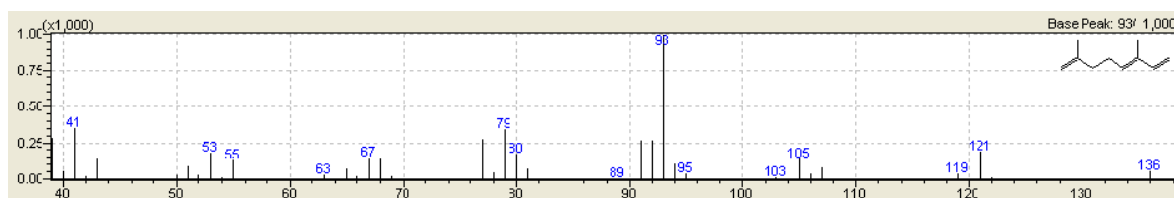

Spectrum of substance  $Z$ - $\beta$ -ocimene of the equipment NIST05 and WILEY'S Library of Mass spectra 9th Edition.

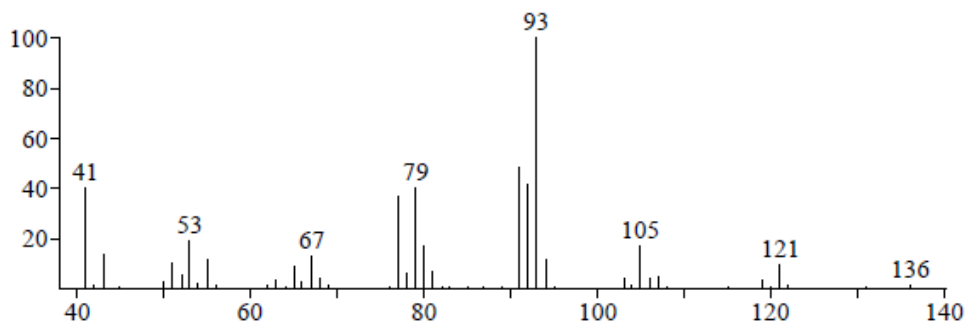

Literature mass spectrum (Adams, 2017).

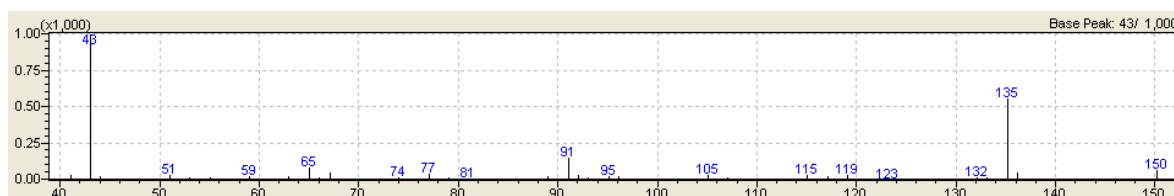

Compound mass spectrum  $p$ -cymen-8-ol.

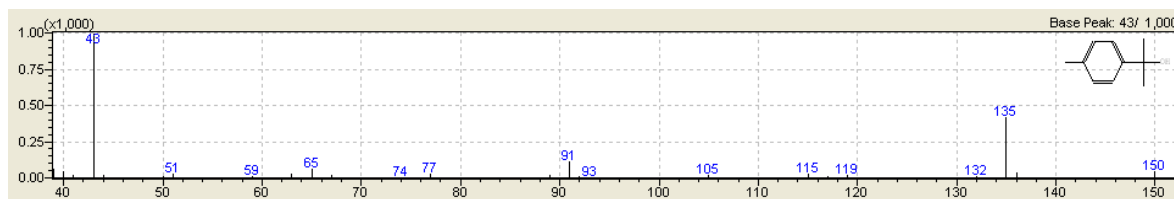

Spectrum of substance *p*-cymen-8-ol of the equipment NIST05 and WILEY'S Library of Mass spectra 9th Edition.

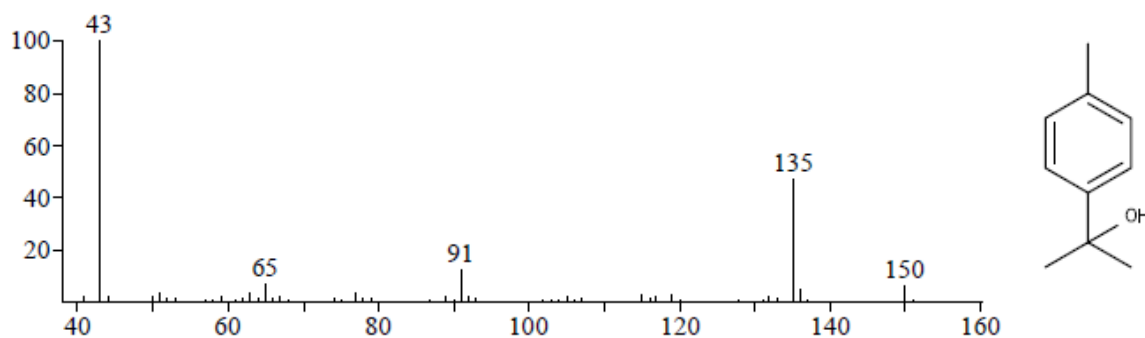

Literature mass spectrum (Adams, 2017).

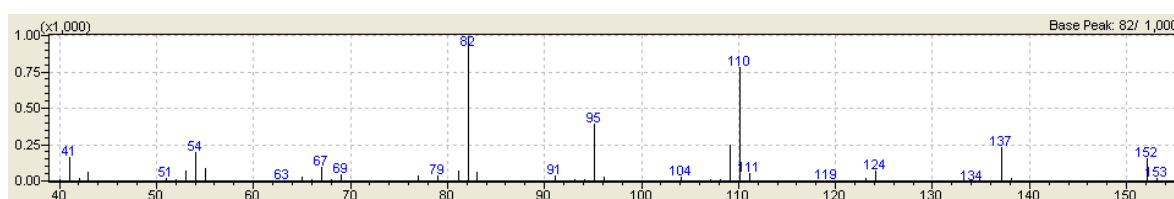

Compound mass spectrum Piperitone.

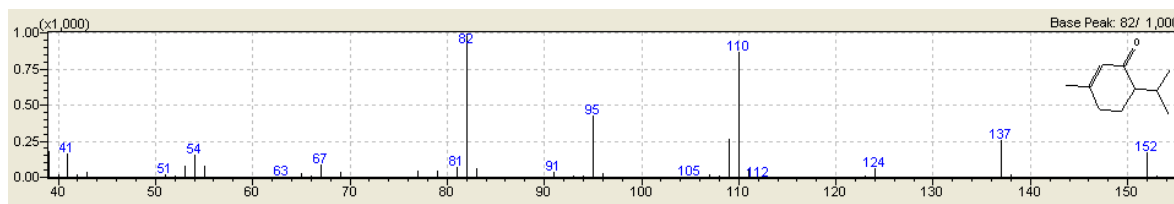

Spectrum of substance Piperitone of the equipment NIST05 and WILEY'S Library of Mass spectra 9th Edition.

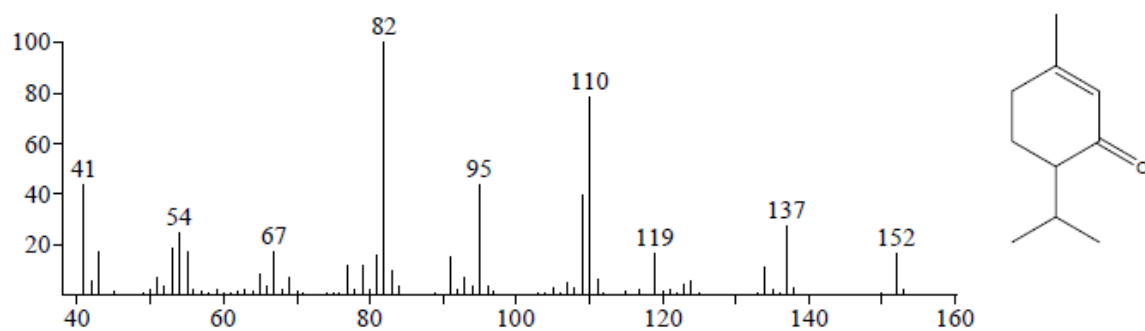

Literature mass spectrum (Adams, 2017).

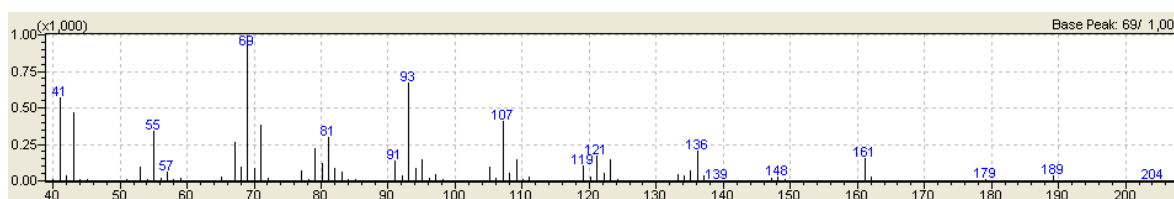

Compound mass spectrum *E*-nerolidol.

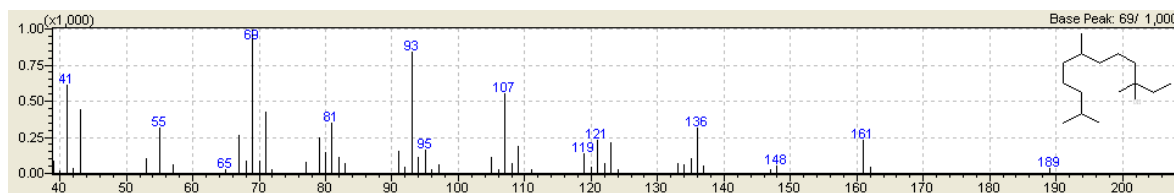

Spectrum of substance *E*-nerolidol of the equipment NIST05 and WILEY'S Library of Mass spectra 9th Edition.

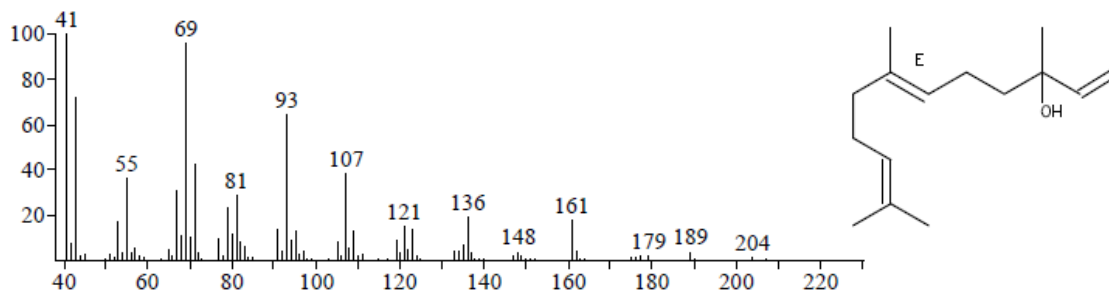

Literature mass spectrum (Adams, 2017).

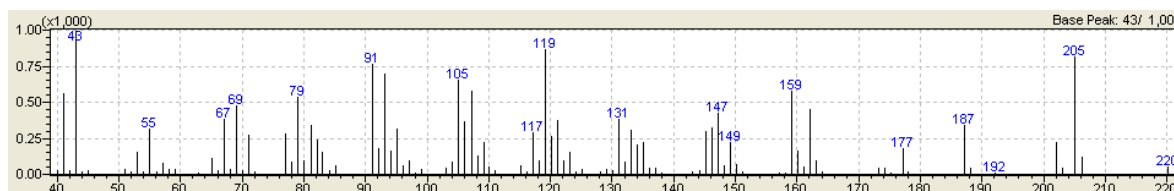

Compound mass spectrum Spathulenol.

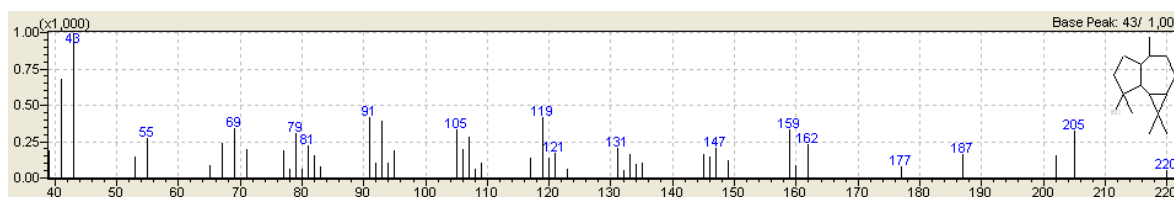

Spectrum of substance Spathulenol of the equipment NIST05 and WILEY'S Library of Mass spectra 9th Edition.

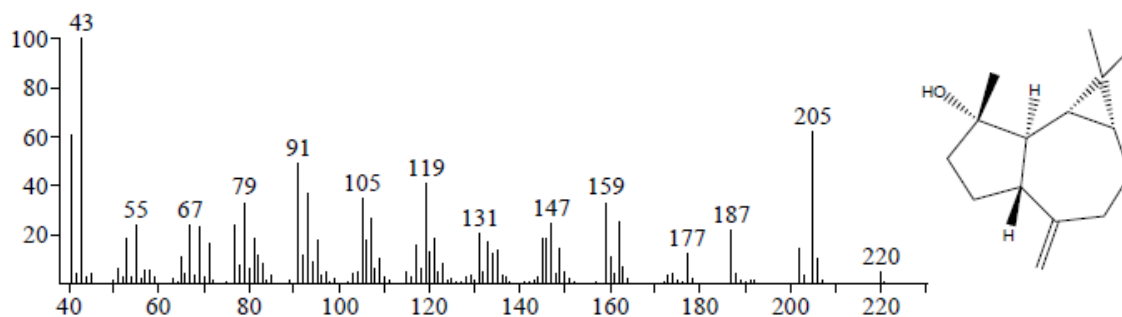

Literature mass spectrum (Adams, 2017).

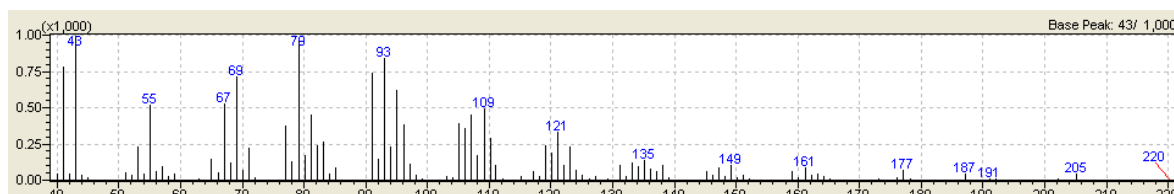

Compound mass spectrum Caryophyllene oxide.

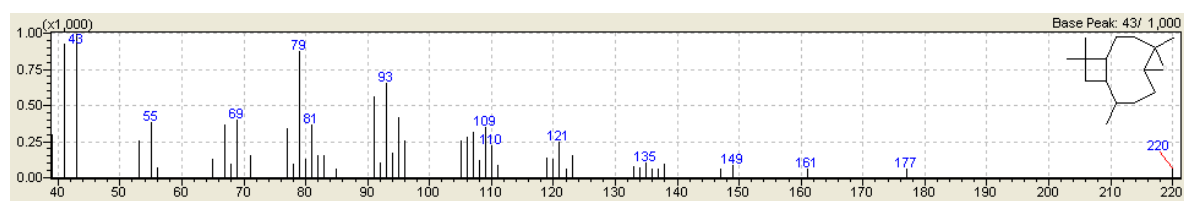

Spectrum of substance Caryophyllene oxide of the equipment NIST05 and WILEY'S Library of Mass spectra 9th Edition.

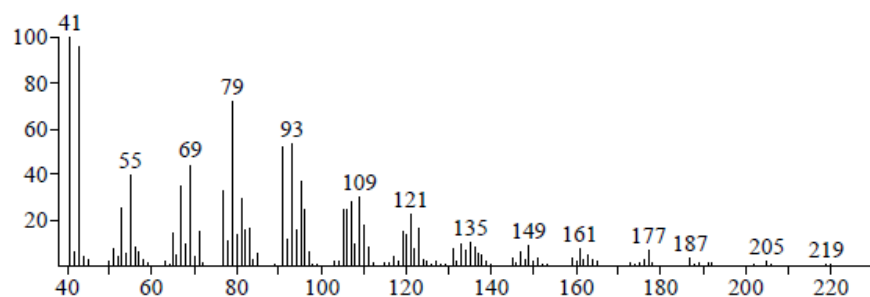

Literature mass spectrum (Adams, 2017).

**Figure S8.** Mass spectra of the major compounds *Tithonia diversifolia* and  $^1\text{H}$  NMR spectrum and  $^{13}\text{C}$  essential oil of *T. diversifolia*.
